# Supplementary material for: Small nucleolar RNAs as new biomarkers in chronic lymphocytic leukemia
Source: PubMed Central journal article supplement (PMC3766210; doi:10.1186/1755-8794-6-27), 2013-09-03
Supplement: 1755-8794-6-27-S4.pdf [file 1755-8794-6-27-S4.pdf]

**Additional file 4 - Supervised analysis comparing peripheral B-cell and CLL samples.** List of the 103 differentially expressed sno/scaRNAs identified by a high stringent supervised analysis between peripheral B-cell and CLL patients (SAM, q-value 0).

| sno/scaRNA  | alias      | cytoband | score(d) | Fold Change |
|-------------|------------|----------|----------|-------------|
| SNORD28     | U28        | 11q12.3  | 8.88     | 4.28        |
| SNORD27     | U27        | 11q12.3  | 8.56     | 5.19        |
| SNORD30     | U30        | 11q12.3  | 8.39     | 4.53        |
| SNORD26     | U26        | 11q12.3  | 8.36     | 3.42        |
| SNORD22     | U22        | 11q13    | 7.98     | 3.66        |
| SNORD31     | U31        | 11q12.3  | 7.53     | 3.28        |
| SNORD81     | U81        | 1q25.1   | 6.79     | 3.81        |
| SNORD50A    | U50        | 6q14.3   | 6.65     | 5.65        |
| SNORD59B    | U59B       | 12q13.3  | 6.57     | 3.58        |
| SNORD59A    | U59A       | 12p13.31 | 6.29     | 3.21        |
| SNORD50B    | U50B       | 6q14.3   | 6.27     | 5.04        |
| SCARNA9     | mgU2-19/30 | 11q21    | 6.23     | 3.64        |
| SNORD61     | U61        | Xq26.3   | 6.09     | 3.86        |
| SNORD47     | U47        | 1q25.1   | 5.91     | 3.39        |
| SNORD54     | U54        | 8q12.1   | 5.84     | 3.86        |
| SNORD57     | U57        | 20p13    | 5.84     | 1.69        |
| SNORA70D    | U70D       | 16q22    | 5.81     | 1.73        |
| SNORA54     | ACA54      | 11p15.4  | 5.81     | 3.60        |
| SNORA27     | ACA27      | 13q12.2  | 5.73     | 2.19        |
| SNORD21     | U21        | 1p22.1   | 5.67     | 2.77        |
| SCARNA7     | U90        | 3q25.22  | 5.66     | 2.72        |
| SNORD44     | U44        | 1q25.1   | 5.65     | 3.51        |
| SNORA68     | U68        | 19p13.11 | 5.63     | 2.96        |
| SNORD102    | U102       | 13q12.2  | 5.59     | 2.81        |
| SNORA28     | ACA28      | 14q32.32 | 5.58     | 3.27        |
| SNORA75     | U23        | 2q37.1   | 5.57     | 2.22        |
| SNORA7B     | ACA7B      | 3q21.3   | 5.51     | 3.48        |
| SNORD116-4  | HBII-85-4  | 15q11.2  | 5.51     | 3.09        |
| SNORD82     | U82        | 2q37.1   | 5.42     | 3.21        |
| SNORA33     | ACA33      | 6q23.2   | 5.41     | 3.44        |
| SNORD116-25 | HBII-85-25 | 15q11.2  | 5.40     | 4.80        |
| SNORD116-29 | HBII-85-29 | 15q11.2  | 5.40     | 4.10        |
| SNORD76     | U76        | 1q25.1   | 5.39     | 3.09        |
| SNORD32A    | U32A       | 19q13.33 | 5.39     | 1.88        |
| SNORD34     | U34        | 19q13.33 | 5.37     | 3.23        |
| SNORD12C    | U106       | 20q13.13 | 5.36     | 2.64        |
| SCARNA9L    | SCARNA9L   | Xp22.12  | 5.35     | 3.15        |
| SNORA56     | ACA56      | Xq28     | 5.30     | 2.09        |
| SNORD33     | U33        | 19q13.33 | 5.28     | 1.60        |
| SNORD51     | U51        | 2q33.3   | 5.28     | 2.75        |
| SNORD60     | U60        | 16p13.3  | 5.27     | 5.64        |

|                    |            |          |      |      |
|--------------------|------------|----------|------|------|
| <b>SNORD52</b>     | U52        | 6p21.33  | 5.27 | 3.39 |
| <b>SNORA6</b>      | ACA6       | 3p22.2   | 5.23 | 2.50 |
| <b>SNORD14C</b>    | SNORD14C   | 11q24.1  | 5.22 | 2.19 |
| <b>SNORD55</b>     | U55        | 1p34.1   | 5.18 | 3.31 |
| <b>SNORA70E</b>    | U70E       | 11q14    | 5.17 | 2.81 |
| <b>SNORA29</b>     | ACA29      | 6q25.3   | 5.11 | 2.42 |
| <b>SNORD37</b>     | U37        | 19p13.3  | 5.10 | 2.89 |
| <b>SNORA19</b>     | ACA19      | 10q26.11 | 5.05 | 2.96 |
| <b>SCARNA6</b>     | U88        | 2q37.1   | 4.92 | 2.86 |
| <b>SNORD78</b>     | U78        | 1q25.1   | 4.88 | 3.09 |
| <b>SNORD25</b>     | U25        | 11q13    | 4.86 | 2.63 |
| <b>SNORD79</b>     | U79        | 1q25.1   | 4.85 | 2.57 |
| <b>SNORD116-26</b> | HBII-85-26 | 15q11.2  | 4.83 | 4.08 |
| <b>SNORD105</b>    | U105       | 19p13.2  | 4.82 | 3.29 |
| <b>SNORD94</b>     | U94        | 2p11.2   | 4.81 | 2.46 |
| <b>SNORD63</b>     | U63        | 5q31.2   | 4.80 | 3.57 |
| <b>SNORA38</b>     | ACA38      | 6p21.33  | 4.79 | 1.93 |
| <b>SNORD74</b>     | U74        | 1q25.1   | 4.78 | 1.85 |
| <b>SNORD4A</b>     | mgh18S-121 | 17q11    | 4.75 | 2.07 |
| <b>SNORD46</b>     | U46        | 1p34.1   | 4.74 | 2.66 |
| <b>SNORD68</b>     | HBII-202   | 16q24.3  | 4.71 | 2.07 |
| <b>SNORD116-1</b>  | HBII-85-1  | 15q11.2  | 4.70 | 2.27 |
| <b>SNORD80</b>     | U80        | 1q25.1   | 4.69 | 2.14 |
| <b>SCARNA5</b>     | U87        | 2q37.1   | 4.65 | 2.70 |
| <b>SNORA20</b>     | ACA20      | 6q25.3   | 4.64 | 2.77 |
| <b>SCARNA17</b>    | U91        | 18q21.1  | 4.62 | 2.35 |
| <b>SNORD75</b>     | U75        | 1q25.1   | 4.59 | 2.82 |
| <b>SNORA2B</b>     | ACA2B      | 12q13.11 | 4.59 | 2.41 |
| <b>SNORD58A</b>    | U58A       | 18q21.1  | 4.58 | 2.49 |
| <b>SNORA64</b>     | U64        | 16p13.3  | 4.52 | 2.80 |
| <b>SNORA2A</b>     | ACA2A      | 12q13.11 | 4.51 | 2.48 |
| <b>SNORA16A</b>    | ACA16      | 1p35.3   | 4.49 | 3.59 |
| <b>SNORA62</b>     | E2         | 3p22.2   | 4.47 | 2.29 |
| <b>SNORD8</b>      | mgU6-53    | 14q11.2  | 4.46 | 2.82 |
| <b>SNORD116-11</b> | HBII-85-11 | 15q11.2  | 4.45 | 3.02 |
| <b>SNORD116-13</b> | HBII-85-13 | 15q11.2  | 4.42 | 3.69 |
| <b>SNORD35A</b>    | U35A       | 19q13.33 | 4.42 | 2.13 |
| <b>SNORD95</b>     | U95        | 5q35.3   | 4.40 | 2.43 |
| <b>SNORD24</b>     | U24        | 9q34.2   | 4.37 | 2.97 |
| <b>SNORD14E</b>    | SNORD14E   | 11q24.1  | 4.36 | 3.03 |
| <b>SNORA69</b>     | U69        | Xq24     | 4.28 | 2.25 |
| <b>SNORD116-28</b> | HBII-85-28 | 15q11.2  | 4.28 | 2.06 |
| <b>SNORA44</b>     | ACA44      | 1p35.3   | 4.20 | 2.02 |
| <b>SNORD48</b>     | U48        | 6p21.33  | 4.19 | 2.42 |
| <b>SNORA24</b>     | ACA24      | 4q26     | 4.19 | 3.23 |
| <b>SNORA74A</b>    | U19        | 5q31.2   | 4.14 | 3.10 |
| <b>SNORA80</b>     | ACA67      | 21q22.11 | 4.14 | 1.54 |

|                    |            |          |       |      |
|--------------------|------------|----------|-------|------|
| <b>SNORA50</b>     | ACA50      | 16q21    | 4.13  | 1.77 |
| <b>SCARNA11</b>    | ACA57      | 12p13.31 | 4.12  | 1.77 |
| <b>SNORA45</b>     | ACA3-2     | 11p15.4  | 4.12  | 2.37 |
| <b>SNORD42B</b>    | U42B       | 17q11.2  | 4.11  | 2.01 |
| <b>SNORD116-27</b> | HBII-85-27 | 15q11.2  | 4.09  | 2.18 |
| <b>SNORD56</b>     | U56        | 20p13    | 4.08  | 2.49 |
| <b>SNORD116-22</b> | HBII-85-22 | 15q11.2  | 4.05  | 2.34 |
| <b>SNORD116-16</b> | HBII-85-16 | 15q11.2  | 4.04  | 2.58 |
| <b>SNORD104</b>    | U104       | 17q23.3  | 4.02  | 2.28 |
| <b>SNORA4</b>      | ACA4       | 3q27.3   | 4.00  | 1.97 |
| <b>SNORD43</b>     | U43        | 22q13.1  | 3.99  | 2.26 |
| <b>SNORD73A</b>    | U73a       | 4q31.3   | 3.97  | 1.97 |
| <b>SNORA46</b>     | ACA46      | 16q21    | 3.97  | 2.80 |
| <b>SNORA49</b>     | ACA49      | 12q24.33 | 3.93  | 2.19 |
| <b>SNORA36C</b>    | SNORA36C   | 2p14     | -7.66 | 0.40 |

---
